# Supplementary material
Source: PubMed Central journal article supplement (PMC9295279)
Supplement: 12889_2022_13798_MOESM1_ESM.pdf [file 12889_2022_13798_MOESM1_ESM.pdf]

**Supplementary File:** Children’s Rates of COVID-19 Vaccination as Reported by Parents, Vaccine Hesitancy, and Determinants of COVID-19 Vaccine Uptake Among Children: A Multi-Country Study from the Eastern Mediterranean Region

---

1. Gender:

- Male
- Female

2. Age:

- 18-29
- 30-39
- 40-49
- ≥50

3. Marital status:

- Single
- Married      *Skip to question 2*
- Other      *Skip to question 2*

4. Education level:

- High school or below
- Graduate or post graduate

5. Work or study is

- Health related
- Non health related

6. Country you currently live in .....

7. Previous COVID19 infection:

- Yes
- No

8. Did you take the vaccine?

- Yes      *Skip to question 10*

No

9. Do you intend to be vaccinated?

Yes

No

Maybe

10. Do you have children aged  $\leq 18$  years?

Yes

No

11. How many children do you have?

1

2

3 or more

12. Age of your children?

between 12-17 years

less than 12 years

I have children in both age groups

13. Did any of your children receive the vaccine?

Yes     *Skip to question 13*

No     *Skip to question*

14. Why did they take the vaccine?

*Tick all that apply.*

- Mandatory for school
- Mandatory for travelling
- Forced by governmental regulations
- To protect them/the family
- Influenced recommended by friends/relatives
- My child is in high-risk group
- Recommended by a physician
- To reduce transmission in schools

15. Do you think vaccine is needed for those aged  $\leq 18$  years?

Yes

No

I don't know

16. What brand do you feel is safer for this age group?

*Tick all that apply.*

Pfizer (American)

Sinopharm

Astrazeneca Moderna

Sputnik

All are safeNone

17. Does having the choice of vaccine type will affect your decision

Yes

No

Neutral

18. Would you advise other parents to vaccinate their children?

Yes

No

Neutral

## 19. Attitude towards COVID-19 vaccination

The following questions ask about attitudes toward COVID-19 vaccination for children younger than 18 years. You will find statements in the list. **Please mark only one choice as follows:**

**1. Disagree**

**2. Neutral**

**3. Agree**

|                                                                                   | 1                     | 2                     | 3                     |
|-----------------------------------------------------------------------------------|-----------------------|-----------------------|-----------------------|
| 1. COVID-19 vaccines protect children from COVID-19 infection                     | <input type="radio"/> | <input type="radio"/> | <input type="radio"/> |
| 2. COVID-19 vaccines are safe for children.                                       | <input type="radio"/> | <input type="radio"/> | <input type="radio"/> |
| 3. I encourage children's vaccination against COVID-19.                           | <input type="radio"/> | <input type="radio"/> | <input type="radio"/> |
| 4. COVID-19 infection can occur even after vaccination.                           | <input type="radio"/> | <input type="radio"/> | <input type="radio"/> |
| 5. Children who were infected with COVID-19 do not need to get vaccinated         | <input type="radio"/> | <input type="radio"/> | <input type="radio"/> |
| 6. Natural immunity is better than the vaccine                                    | <input type="radio"/> | <input type="radio"/> | <input type="radio"/> |
| 7. Healthy children do not need a vaccine against COVID-19.                       | <input type="radio"/> | <input type="radio"/> | <input type="radio"/> |
| 8. COVID-19 is exaggerated, it's not a risky disease, so no vaccination is needed | <input type="radio"/> | <input type="radio"/> | <input type="radio"/> |

9. Masks, hygiene, social distance, and other protective measures are enough

10. I oppose all vaccines for children. ((Not only COVID-19 vaccine)

11. Vaccination is only needed for the elderly and those with chronic illnesses ((like children with asthma))

12. COVID-19 vaccine benefits outweigh the side effects.

13. Children should not be vaccinated because the long-term effects of vaccination are unknown.

14. Children must be vaccinated if it was recommended by a physician/MOH

15. The government has the right to force everyone to get COVID-19 vaccine.

16. COVID-19 vaccine will end the pandemic.

17. Children should not be vaccinated because vaccination is painful.

18. Children should not be vaccinated due to lack of scientific studies about COVID-19 vaccination on children.

19. Vaccine is Not effective due to frequent mutations
